# Supplementary material for: Psychiatrist and Patient Responses to Suspected Medication Nonadherence in Schizophrenia Spectrum Disorders
Source: Atypon-hosted journal article supplement (doi:10.1176/appi.ps.201300322), 2014-04-01
Supplement: 881_ds001.pdf [file 881_ds001.pdf]

**Acknowledgments and disclosures (expanded)**

This work was funded by unrestricted grant F1D-SB-O336 from Eli Lilly and Company, Germany. The authors thank the participating patients and physicians of the following hospitals: Klinik und Poliklinik für Psychiatrie und Psychotherapie der Technischen Universität München (Dr. Hamann, Dr. Kissling); Psychiatrischen Klinik der Ludwig-Maximilians-Universität München (Prof. Falkai); Danuviusklinik Pfaffenhofen (PD Dr. Messer); kbo-Lech-Mangfall-Klinik Agatharied (Dr. Fehler); BRK Tagklinik für psychisch Kranke (Dr. Mirisch); kbo-Lech-Mangfall-Klinik Landsberg am Lech (Dr. Kulmann); BKH Augsburg (Prof. Schmauß); kbo-Isar-Amper-Klinikum Taufkirchen (Vils) (Prof. Dose); kbo-Lech-Mangfall-Klinik Garmisch-Partenkirchen (Dr. Scherer, Dr. Dobmaier); BKH Landshut (Prof. Spieß); BKH Regensburg (Dr. Landgrebe); kbo-Inn-Salzach-Klinikum Wasserburg (Prof. Laux); Klinik und Poliklinik für Psychiatrie und Psychotherapie des Universitätsklinikums Hamburg-Eppendorf (Prof. Naber, Prof. Lambert); Zentrum für seelische Gesundheit, Asklepios Klinik Harburg (Dr. Unger); Abteilung für Psychiatrie, Asklepios Klinik West (Prof. Sadre-Chirazi-Stark); ASKLEPIOS Klinik Nord – Ochsenzoll (Prof. Lammers); Evangelische Krankenhaus Alsterdorf, Klinik für Psychiatrie (Prof. Lemke); BKH Günzburg (Prof. Becker); BKH Mainkofen (Prof. Schreiber), Klinik und Poliklinik für Psychiatrie und Psychotherapie der Universität Leipzig (Prof. Hegerl, PD. Dr. Kluge); Fachklinikum Uchtsprünge (Dr. Dr. Wolfowskij); Fachklinikum Bernburg (Dr. Künstler).

Dr. Hamann has received lecture honoraria from Johnson & Johnson, Eli Lilly, and AstraZeneca.

Dr. Kissling has received support from Janssen Cila, Eli Lilly, Otsuka, and AstraZeneca. The other authors report no competing interests.
